# Supplementary material
Source: publisher figshare collection journal article supplement (https://gsapubs.figshare.com/ndownloader/files/36344598)
Supplement: Supplementary file 1 [file 36344598]

## Sheet: Table S6. Geochronology data
Location	Sample number	Lat	Lon	Type	Best_age	Age	1-sigma	Sample_type	Group	Source	Notes	Spencer, J.E., Richard, S.M., Bykerk-Kauffman, A., Constenius, K.N., and Valencia, V.A., 2022, Structure, chronology, kinematics, and geodynamics of tectonic extension in the greater Catalina metamorphic core complex, southeastern Arizona, USA: Geosphere, v. 18, https://doi.org/10.1130/GES02485.1
Tortolita Mts., W edge	CAF-02-3628	32.5445	-111.144	40Ar/39Ar	17.69±0.17 2σ	17.69	0.09	sanidine	1A (Tt)	Peters et al., 2003	non-welded tuff in Tcg
Chief Butte, N Tortolita area	JES-3-26-02-1	32.6572	-111.015	40Ar/39Ar	19.68±0.30 2σ	19.68	0.15	sanidine	1A (Tt)	Peters et al., 2003	10-cm-thick non-welded tuff in Tcg
Black Hills near San Manuel	2-8-21-1	32.72	-110.751	U-Pb LA-ICP-MS	25.1±0.4 2σ	25.1	0.2	zircon	1A (Tt)	Supplemental Data. Data Item 3	Signal Peak area, tuff in Cloudburst Fm
Empire Mts - S Rincon area	FK-1336	31.9855	-110.586	40Ar/39Ar	26.44±0.09 2σ	26.44	0.05	sanidine	1A (Tt)	Peters et al., 2003	rhyolitic tuff <10 m thick in Tcg-Tss
Mescal Quad next to Cienega Basin	4-29-96-1	31.9622	-110.493	40Ar/39Ar	26.54±0.08 2σ	26.54	0.04	sanidine	1A (Tt)	Spencer et al., 2017	thin tuff bed in basal Pantano Fm
Exxon State (32)-1 drill hole (2584-2609 m)	Exxon State 2600	32.0686	-110.834	40Ar/39Ar	26.91±0.19 2σ	26.91	0.19	biotite	1A (Tt)	Houser et al., 2005	169 m thick silicic tuff in subsurface unit correlated with the Pantano Formation
Sierrita Mts	JES 4-8-03-3	31.9302	-111.113	40Ar/39Ar	27.49±0.15 2σ	27.49	0.08	sanidine	1A (Tt)	Spencer et al., 2017	thin tuff within conglomerate
Empire Mts - S Rincon area	FK-1707	31.9632	-110.582	40Ar/39Ar	27.50±0.09 2σ	27.5	0.05	sanidine	1A (Tt)	Peters et al., 2003	thin tuff within conglomerate
Cienega Basin, I-10 roadcut	5-6-98-1	31.9964	-110.618	40Ar/39Ar	33.01±0.38 2σ	33.01	0.19	sanidine	1A (Tt)	Spencer et al., 2017	Welded rhyolitic tuff below conglomerate of the Pantano Fm
Arivaipa Canyon, Galiuro Mts.	3-23-98-2	32.9071	-110.561	40Ar/39Ar	33.47±0.08 2σ	33.47	0.04	sanidine	1A (Tt)	Spencer et al., 2017	"White rhyolite tuff" 0-8 m thick, interbedded with basal conglomerate (Krieger, 1968)
Samaniego Hills	PP-9/37/DD13	32.549	-111.465	40Ar/39Ar	22.19±0.12	22.19	0.12	biotite	1A (Tv)	Brooks and Snee, 1996 (USGS Bull 2154)	trachyte lava of Sasco
Sawtooth Mountains (AZGS OFR 99-16)	F9-121	32.6204	-111.79	40Ar/39Ar	22.64±0.05	22.64	0.05	sanidine	1A (Tv)	Ferguson et al., 1999 (AZGS OFR 99-16)	trachyte lava
San Manuel mine area	3-27-08-4	32.737	-110.682	40Ar/39Ar	23.2±0.4	23.2	0.4	sanidine	1A (Tv)	Spencer et al., 2017	rhyolite lava dome
Tortolita Mts. NE	CAF-02-3233	32.5827	-110.996	U-Pb TIMS	25.1±0.6	25.1	0.6	zircon	1A (Tv)	Spencer et al., 2003 (AZGS OFR 03-08)	undeformed dacite porphyry dike that cuts across Carpus Wash shear zone, northeastern Tortolita Mountains
Silverbell Mts. (Ragged Top)	F9-167	32.4507	-111.487	40Ar/39Ar	25.69±0.06	25.69	0.06	sanidine	1A (Tv)	Ferguson et al., 1999 (AZGS OFR 99-17)	Intrusive rhyolite of Ragged Top, northern Silver Bell Mountains
Star Flat area, Falcon Valley	TO2-715	32.713	-110.869	40Ar/39Ar	26.33±0.1 2σ	26.33	0.05	sanidine	1A (Tv)	Peters et al., 2003	tuff within conglomerate, ~5m thick, associated with thick mafic lava flows
Tortolita Mts N	CAF-02-1680	32.6069	-111.129	40Ar/39Ar	26.39±0.07 2σ	26.39	0.04	sanidine	1A (Tv)	Peters et al., 2003	welded rhyolitic tuff, <15 m thick, in mafic lavas. Petrographically identical to dated tuff in Star Flat area.
Empire Mts	FK-3062	31.8799	-110.664	40Ar/39Ar	26.59±0.13 2σ	26.59	0.07	biotite	1A (Tv)	Peters et al., 2003	dacite dome, S Empire Mts
Tucson Mts., Safford Dacite		32.342	-111.165	40Ar/39Ar	26.6±0.1	26.6	0.1	biotite	1A (Tv)	Lipman, 1993 (I-2205)	rhyolite lava flow
Tumamoc Hill area, Tucson Mts.	CAF-2-8915	32.209	-110.994	40Ar/39Ar	27.06±0.09 2σ	27.06	0.05	sanidine	1A (Tv)	Spencer et al., 2017	30-36 m thick Tumamoc tuff in volcanic sequence
Sierrita Mts., Tinaja Peak area	CAF-2-3977	31.8255	-111.141	40Ar/39Ar	27.06±0.23	27.06	0.12	hornblende	1A (Tv)	Spencer et al., 2017	dacite lava
Hooker Hot Sprs., Galiuro Mts	BJJ-4284	32.3561	-110.247	40Ar/39Ar	27.28±0.06 2σ	27.28	0.03	sanidine	1A (Tv)	Spencer et al., 2015b (AZGS OFR 15-06)	rhyolite ash-flow tuff in volcanic sequence
Hooker Hot Sprs., Galiuro Mts	3-19-14-2	32.3374	-110.246	40Ar/39Ar	27.88±0.02 2σ	27.88	0.01	biotite	1A (Tv)	Spencer et al., 2015b (AZGS OFR 15-06)	bedded pyroclastic rocks
Sombrero Butte, Galiuro Mts.	2-26-08-3A bi	32.7136	-110.488	40Ar/39Ar	28.0±0.5	28	0.5	biotite	1A (Tv)	Spencer et al., 2017	Welded tuff of Sombrero Butte, ~80 m thick, near top of thick Galiuro volcanic sequence
Sombrero Butte, Galiuro Mts.	CAF-2-22357 sa1	32.6761	-110.439	40Ar/39Ar	28.2±0.5	28.2	0.5	sanidine	1A (Tv)	Spencer et al., 2017	Lowermost trachytic lava in thick Galiuro volcanic sequence E of Sombrero Butte
Redfield Cyn, Galiuro Mts	4-3-07-6	32.4306	-110.389	40Ar/39Ar	29.8±0.5	29.8	0.5	biotite	1A (Tv)	Spencer et al., 2017	Tuff at base of basalt and overlying Tv
NE Rincon Mts, Mineta Ridge				K-Ar		26.92	2.4	plagioclase	1B (Tap)	Shafiqullah et al., 1978	Turkey Track andesite porphyry, Mineta Ridge
Del Bac Hills				K-Ar		26.94	0.8	plagioclase	1B (Tap)	Percious, 1968	Turkey Track andesite porphyry (Tap), Del Bac Hills, sample JKP-9-67, plagioclase
Del Bac Hills				K-Ar		27.6	0.8	groundmass	1B (Tap)	Percious, 1968	Turkey Track, Del Bac Hills, sample JKP-9-67, groundmass, no magnetics
Del Bac Hills				K-Ar		27.98	0.8	groundmass	1B (Tap)	Percious, 1968	Turkey Track, Del Bac Hills, sample JKP-9-67, treated with HF, ultrasonic
Tumamoc Hill area, Tucson Mts.				K-Ar		28.6	2.7	plagioclase	1B (Tap)	Damon and Bikerman, 1964	Turkey Track, Tumamoc Hill
Tortolita Granite	CAF-02-3636	32.4822	-111.048	U-Pb TIMS	24.2 +/- 1.3 U-Pb	24.2	1.3	zircon	1C (Tgr)	Spencer et al., 2015 (AZGS DI-46)
Wild Burro Canyon qtz monz	CAF-2-3710	32.4771	-111.121	U-Pb LA-ICP-MS	24.4 +/- 0.3 U-Pb	24.4	0.3	zircon	1C (Tgr)	Spencer et al., 2015 (AZGS DI-46)
Catalina Granite	Tgc-1406	32.4545	-110.815	U-Pb LA-ICP-MS	24.70 +/- 0.18 U-Pb	24.7	0.18	zircon	1C (Tgr)	Ducea et al., 2020
Wild Burro Canyon qtz monz	Tgc-1405	32.5042	-111.056	U-Pb LA-ICP-MS	24.84 +/- 0.14 U-Pb	24.84	0.14	zircon	1C (Tgr)	Ducea et al., 2020
Catalina Granite	Tgc-1408	32.5068	-110.846	U-Pb LA-ICP-MS	25.00 +/- 0.17 U-Pb	25	0.17	zircon	1C (Tgr)	Ducea et al., 2020
N Picacho Mts	11-11-20-1	32.8223	-111.352	U-Pb LA-ICP-MS	25.1± 0.3	25.1	0.3	zircon	1C (Tgr)	Supplemental Data. Data Item 3	Picacho Reservoir granite
S Picacho Mts	11-11-20-2	32.6925	-111.378	U-Pb LA-ICP-MS	25.4± 0.5	25.4	0.5	zircon	1C (Tgr)	Supplemental Data. Data Item 3	Barnett Well granite
Durham Hills	9-12-03-1	32.737	-111.136	U-Pb TIMS	25.7 ± 0.1 Ma	25.7	0.1	zircon	1C (Tgr)	Spencer et al., 2015 (AZGS DI-46)	Porphyritic phase of granite from northeastern Durham Hills
Catalina Granite	KJJ 10-1	32.4798	-110.87	U-Pb LA-ICP-MS	25.8 +/- 0.5 U-Pb	25.8	0.5	zircon	1C (Tgr)	Fornash et al., 2013
Dragoon Mts	11-25-20-2	31.9522	-109.963	U-Pb LA-ICP-MS	25.8± 0.3	25.8	0.3	zircon	1C (Tgr)	Supplemental Data. Data Item 3	Stronghold Granite
Tortolita Mts.	CAF-02-3710	32.477	-111.12	40Ar/39Ar	22.36 +/- 0.15	22.36	0.15	biotite	1D (gr-gn)	Spell et al., 2003	granite of Wild Burro Canyon
Santa Catalina Mts.	11-27-01-1	32.3959	-110.927	40Ar/39Ar	23.41 +/- 0.15	23.41	0.15	biotite	1D (gr-gn)	Spell et al., 2003	pegmatite hosted by Cretaceous granite of Alamo Canyon. 7 km from Catalina Granite
Northern Suizo Mts.	SMR-0692	32.697	-111.119	40Ar/39Ar	23.44 +/- 0.23	23.44	0.23	biotite	1D (gr-gn)	Spell et al., 2003	muscovite leucogranite in the northern Suizo Mountains
Northern Suizo Mts.	SMR-0692	32.697	-111.119	40Ar/39Ar	23.5 +/- 0.13	23.5	0.13	muscovite	1D (gr-gn)	Spell et al., 2003	muscovite leucogranite in the northern Suizo Mountains
Tortolita Mts. SE	CAF-02-3636	32.4821	-111.047	40Ar/39Ar	23.69 +/- 0.15	23.69	0.15	biotite	1D (gr-gn)	Spell et al., 2003	medium-granied granite of Tortolita Mountains
Catalina Mts, Seven Falls	CAT 93-9	32.3297	-110.792	40Ar/39Ar	24 +/- 1	24	1	biotite	1D (gr-gn)	Terrien, 2012	isochron. 12.4 km from Catalina Granite.
Catalina Mts, Gibbon Mtn	CAT 93-8	32.3217	-110.812	40Ar/39Ar	24.02 +/- 0.30	24.02	0.3	muscovite	1D (gr-gn)	Terrien, 2012	93.4% of total gas. 13.5 km from Catalina Granite.
Tortolita Mts.	CAF-02-2668	32.5311	-111.058	40Ar/39Ar	24.07 +/- 0.13	24.07	0.13	biotite	1D (gr-gn)	Spell et al., 2003	non-mylonitic dike intruding mylonitic granitoids in north-central Tortolita Mts.
Santa Catalina Mts.	12-27-04-2	32.3319	-110.74	40Ar/39Ar	24.67 +/- 0.06	24.67	0.06	muscovite	1D (gr-gn)	Spencer et al., 2017	Catalina forerange. 12.5 km from Catalina Granite.
Durham Hills	SMR-0518	32.695	-111.157	40Ar/39Ar	24.82 +/- 0.16	24.82	0.16	biotite	1D (gr-gn)	Spell et al., 2003	Diorite to granodiorite of Durham Hills. Unit is intruded by the Porphyritic granodiorite of the Durham Hills. Both, representing almost all the Hills, must be late Oligocene or younger.
Santa Catalina Mts.	12-31-01-1	32.3744	-110.952	40Ar/39Ar	24.96 +/- 0.13	24.96	0.13	muscovite	1D (gr-gn)	Spell et al., 2003	Muscovite leucogranite sill within granite of Alamo Canyon. 10 km from Catalina Granite.
Tortolita Mts.	BJ 243	32.5671	-111.077	40Ar/39Ar	25.29 +/- 0.15	25.29	0.15	muscovite	1D (gr-gn)	Spell et al., 2003	leucogranite in the northern Tortolita Mts.
Catalina Mts, Catnip	CAT 93-1	32.3522	-110.729	40Ar/39Ar	26 +/- 1	26	1	biotite	1D (gr-gn)	Terrien, 2012	isochron
Catalina Mts, Shreve Pass	CAT 07-03	32.3447	-110.734	40Ar/39Ar	26 +/- 0.4	26	0.4	biotite	1D (gr-gn)	Terrien, 2012	isochron
Catalina Mts, Windy Point	CAT 07-05	32.3678	-110.716	40Ar/39Ar	26.3 +/- 0.33	26.3	0.33	muscovite	1D (gr-gn)	Terrien, 2012	94.4% of total gas
Catalina Mts, General Hitchcock	CAT 07-4	32.3772	-110.688	40Ar/39Ar	28 +/- 1	28	1	muscovite	1D (gr-gn)	Terrien, 2012	isochron
Tortolita Mts.	4-14-03-2 bt	32.5762	-111.004	40Ar/39Ar	28.72 +/- 0.07	28.72	0.07	biotite	1D (gr-gn)	Spencer et al., 2017
Rincon Mountains		32.1363	-110.64	K-Ar	20.9 +/- 0.4 1σ (K-Ar)	20.9	0.4	illite	1E (illite)	Damon and Shafiqullah, 2006
Rincon Mountains		32.1418	-110.682	K-Ar	21.0 +/- 0.5 1σ (K-Ar)	21	0.5	illite	1E (illite)	Damon and Shafiqullah, 2006
Rincon Mountains		32.1436	-110.683	K-Ar	21.0 +/- 0.5 1σ (K-Ar)	21	0.5	illite	1E (illite)	Damon and Shafiqullah, 2006
Rincon Mountains		32.1471	-110.732	K-Ar	21.4 +/- 0.5 1σ (K-Ar)	21.4	0.5	cataclasite	1E (illite)	Damon and Shafiqullah, 2006
Santa Catalina forerange	4			fission track		18.8	1.8	apatite	1F (ft ap)	Fayon et al., 2000	Wilderness
Santa Catalina forerange	2			fission track		20.2	1.7	apatite	1F (ft ap)	Fayon et al., 2000	Leatherwood
Santa Catalina forerange	1			fission track		20.7	2.9	apatite	1F (ft ap)	Fayon et al., 2000	Oracle
Santa Catalina main range	5			fission track		21.4	2.2	apatite	1F (ft ap)	Fayon et al., 2000	Leatherwood
Santa Catalina Mts. (Rice Peak)	KJJ 09-8	32.4794	-110.697	U-Pb LA-ICP-MS	73 (+1.5/-1.1)	73	0.55	zircon	2A	Fornash et al., 2013	Rice Peak Porphyry; 1.5/-1.1 is 2-sigma uncertainty but - side is relevant to correlation
Tucson Mts. (Amole gr)	7-14-06-1	32.287	-111.202	U-Pb LA-ICP-MS	72.5 ± 0.1 Ma	72.5	0.1	zircon	2B	Spencer et al., 2015a (AZGS DI-46)	Amole Granite, main phase
Tucson Mts. (Amole gd)	4-8-03-1	32.2883	-111.163	U-Pb TIMS	73.4 ± 0.2 Ma	73.4	0.2	zircon	2B	Spencer et al., 2015a (AZGS DI-46)	Amole pluton, mafic border phase
Santa Catalina Mts. (Alamo)	KJJ 10-2	32.3745	-110.949	U-Pb LA-ICP-MS	67.2 (+1.1/-2.4) Ma	67.2	0.55	zircon	2C	Fornash et al., 2013	Granite of Alamo Canyon; 1.1/-2.4 is 2-sigma uncertainty but + side is relevant to correlation
Santa Catalina Mts. (Alamo)	11-23-01-3	32.4073	-110.91	U-Pb LA-ICP-MS	67.71 ± 0.52 Ma	67.71	0.52	zircon	2C	Spencer et al., 2015a (AZGS DI-46)	Gr of Alamo Canyon, Alamo Canyon (zirs from samp 11-23-01-3 min sep, samp dated previously by Isachsen)
Santa Catalina Mts. (Alamo)	8-21-05-1	32.3745	-110.949	U-Pb LA-ICP-MS	69.9 ± 1.4 Ma	69.9	1.4	zircon	2C	Spencer et al., 2015a (AZGS DI-46)	Granite of Alamo Canyon, Pusch Peak area
Santa Catalina Mts. (Alamo)	11-23-01-3	32.4073	-110.91	U-Pb TIMS	71 ± 1 Ma	71	1	zircon	2C	Spencer et al., 2003 (AZGS OFR 03-08)	Granite of Alamo Canyon, Alamo Canyon
Santa Catalina Mts. (Leatherwood)	KJJ 09-7	32.4524	-110.753	U-Pb LA-ICP-MS	69.1 (+1.2/-2.9)	69.1	0.6	zircon	2D	Fornash et al., 2013	Leatherwood granodiorite; 1.2/-2.9 is 2-sigma uncertainty but + side is relevant to correlation
Santa Catalina Mts. (Leatherwood)	8-19-08-2	32.4523	-110.753	U-Pb LA-ICP-MS	69.8 ± 1.4 Ma	69.8	1.4	zircon	2D	Spencer et al., 2015a (AZGS DI-46)	Leatherwood quartz diorite, Oracle Control Road, Catalina Mts., Pima County, AZ
Tortolita Mts. (Chirreon)	CAF-02-2666	32.5438	-111.052	U-Pb TIMS	69.5 ± 0.5 Ma	69.5	0.5	zircon	2E	Spencer et al., 2003 (AZGS OFR 03-08)	Pluton of Chirreon Wash
S Pineleno Mts	11-25-20-3	32.5632	-109.733	U-Pb LA-ICP-MS	27.7± 0.3	27.7	0.3	zircon	3 (KT)	Supplemental Data. Data Item 3	Gillespie Granite
Ninetysix Hills	10-26-20-1	32.8593	-111.106	U-Pb LA-ICP-MS	55.4±0.8	55.4	0.8	zircon	3 (KT)	Supplemental Data. Data Item 3	96 Ranch muscovite granite
Rincon Mts	11-25-20-1	32.1522	-110.449	U-Pb LA-ICP-MS	55.5±0.9	55.5	0.9	zircon	3 (KT)	Supplemental Data. Data Item 3	Happy Valley granodiorite

## Sheet: Table S7. Geochron data sources
Reference
Brooks, W.E., and Snee, L.W., 1996, Timing and effect of detachment-related potassium metasomatism on 40Ar/39Ar ages from the Windous Butte Formation, Grant Range, Nevada: U.S. Geological Survey Bulletin 2154, 25 p.
Damon, P.E., and Bikerman, M., 1964, Potassium-argon dating of post-Laramide plutonic and volcanic rocks within the Basin and Range province of southeastern Arizona and adjacent areas: Arizona Geological Society Digest v. 7, p. 63-78.
Damon, P.E., and Shafiqullah, M., 2006, K-Ar dates of fault rocks along the Catalina detachment fault, Tanque Verde Ridge, Rincon Mountains, Arizona: Arizona Geological Survey, Contributed Report CR-06-A, 18 p.
Ducea, M.N., Triantafyllou, A., and Krcmaric, J., 2020, New timing and depth constraints for the Catalina metamorphic core complex, southeast Arizona: Tectonics, v. 39, e2020TC006383; https://doi.org/10.1029/2020TC006383
Fayon, A.K., et al. (2000), Fission track analysis of the footwall of the Catalina detachment fault, Arizona: Tectonic denudation, magmatism and erosion, Journal of Geophysical Research, 105(B5), 11047-11062.
Ferguson, C.A., Gilbert, W.G., Klawon, J.E., Pearthree, P.A., and Peters, L., 1999, Geologic map of the Sawtooth Mountains and the north end of the West Silver Bell Mountains, Pinal and Pima Counties, southern Arizona: Arizona Geological Survey Open-File Report 99-16, 1 plate, scale 1:24,000, with 25 p. text.
Ferguson, C.A., Gilbert, W.G., Orr, T.R., Spencer, J.E., Richard, S.M., and Pearthree, P.A., 1999, Geologic map of the Samaniego Hills, Pinal and Pima Counties, southern Arizona: Arizona Geological Survey Open-File Report 99-17, 1 plate, scale 1:24,000, with 15 p. text.
Fornash, K.F., Patchett, P.J., Gehrels, G.E., and Spencer, J.E., 2013, Evolution of granitoids in the Catalina metamorphic core complex, southeastern Arizona: U-Pb, Nd, and Hf isotopic constraints: Contributions to Mineralogy and Petrology, v. 165, p. 1295-1310; DOI 10.1007/s00410-013-0859-4
Lipman, P.W., 1993, Geologic map of the Tucson Mountains caldera, southern Arizona: U.S. Geological Survey Miscellaneous Investigations Series Map I-2205, 2 sheets, scale 1:24,000.
Percious, J.K., 1968, Geology and geochronology of the Del Bac Hills, Pima County, Ariozna, in Titley, S.R., ed., Southern Arizona Guidebook III: Arizona Geological Society, p. 199-207.
Peters, L., Ferguson, C.A., Spencer, J.E., and Dickinson, W.R., 2003, Sixteen 40Ar/39Ar geochronology analyses from southeastern Arizona: Arizona Geological Survey Open File Report 03-02, 4 p., 4 sheets.
Shafiqullah, M., Damon, P. E., Lynch, D. J., Kuck, P. H., and Rehrig, W. A., 1978, Mid-Tertiary magmatism in southeastern Arizona, in Callender, J. F., Wilt, J.C., and Clemons, R.E., eds., Land of Cochise: Socorro, New Mexico Geological Society 29th Field Conference Guidebook, p. 231-241.
Spell T., Zanetti, K., Spencer, J.E., Richard, S.M., Ferguson, C.A., Skotnicki, S.J., and Orr, T., 2003, Eighteen new 40Ar/39Ar thermochronologic analyses from southern and central Arizona: Arizona Geological Survey Open File Report 03-03, 63 p.
Spencer, J.E., Ferguson, C.A., Johnson, B.J., Gehrels, G., Pecha, M., Doe, M., 2015a, A partial compilation and database of U-Pb geochronologic data and sample locations in Arizona and southeastern-most California: Arizona Geological Survey Digital Information Series DI-46, 2 p., with ArcMap shapefile, Excel Workbook, and 2 appendices (data tables and location maps).
Spencer, J.E., Ferguson, C.A., Richard, S.M., McIntosh, W.C., and Peters, L., 2017, A partial compilation and database of 40Ar-39Ar and K-Ar geochronologic data and sample locations in Arizona and southeastern-most California: Arizona Geological Survey Digital Information Series DI-48, 7 p., with Excel Workbook, Access database table, and analytical data.
Spencer, J.E., Isachsen, C.E., Ferguson, C.A., Richard, S.M., Skotnicki, S.J., Wooden, J., and Riggs, N.R., 2003, U-Pb isotope geochronologic data from 23 igneous rock units in central and southeastern Arizona: Arizona Geological Survey Open-File Report 03-08, 40 p
Spencer, J.E., Johnson, B.J and Peters, L. , 2015b, Geology of the Hookers Hot Springs area, Galiuro Mountains, southeastern Arizona: Arizona Geological Survey Open File Report, OFR-15-06, 21 p., 2 appendices.
Terrien, J.J., 2012, The role of magmatism in the Catalina metamorphic core complex, Arizona: Insights from integrated thermochronology, gravity, and aeromagnetic data: Ph.D. dissertation, Syracuse University, 232 p

## Sheet: Table 3. 2020 samples
Location	Unit	Sample number	Spencer GPS	Date	Older intercept	method	Lat (N)	Lon (W)	Type	Best_age	Age	1-sigma	Sample_type	Group	Source	Map reference	Notes
N Picacho Mts	Picacho Reservoir granite	11-11-20-1		25.1± 0.3		Tuff Zirc 206/238 Age	32.8223	-111.352	U-Pb				zircon			Richard, S.M., Spencer, J.E., Ferguson, C.A., and Pearthree, P.A., 1999, Geologic map of the Picacho Mountains and Picacho Peak, Pinal County, southern Arizona: Arizona Geological Survey Open-File Report 99-18, 1 plate, scale 1:24,000, with 43 p. text.	25 Ma K-Ar
S Picacho Mts	Barnett Well granite	11-11-20-2	JES-20-096	25.4± 0.5		Tuff Zirc 206/238 Age	32.6925	-111.378	U-Pb				zircon			Richard, S.M., Spencer, J.E., Ferguson, C.A., and Pearthree, P.A., 1999, Geologic map of the Picacho Mountains and Picacho Peak, Pinal County, southern Arizona: Arizona Geological Survey Open-File Report 99-18, 1 plate, scale 1:24,000, with 43 p. text.
Dragoon Mts	Stronghold Granite	11-25-20-2	JES-20-098	25.8± 0.3		Tuff Zirc 206/238 Age	31.9522	-109.963	U-Pb				zircon			Drewes, H., 1987, Geologic map and cross sections of the Dragoon Mountains, southeastern Arizona: U.S. Geological Survey, Miscellaneous Investigations Series, Map I-1662, scale 1:24,000.
S Pineleno Mts	Gillespie Granite	11-25-20-3	JES-20-099	27.7± 0.3		Tuff Zirc 206/238 Age	32.5632	-109.733	U-Pb				zircon			Swan, M., 1976, The Stockton Pass fault - an element of the Texas Lineament: Tucson, University of Arizona, unpublished M.S. thesis, 119 p. Thorman, C. H., 1981, Geology of the Pinaleño Mountains, Arizona: A preliminary report: Tucson, Arizona Geological Society Digest, v. 13, p. 5-12.	35 Ma K-Ar
Ninetysix Hills	96 Ranch muscovite granite	10-26-20-1	JES-20-094	55.4±0.8	1424±12.3	Lower and Upper intercept age	32.8593	-111.106	U-Pb				zircon			Skotnicki, S.J., 1999, Geologic map of the Ninetysix Hills, Pinal County, Arizona: Arizona Geological Survey Open-File Report 99-20, 4 plates, scale 1:24,000, with 14 p. text.	Two-mica garnet granite with <1% 4-8 mm garnet with ~8-10% mafics that are mostly (all?) biotite
Rincon Mts	Happy Valley granodiorite	11-25-20-1	JES-20-097	55.5±0.9	1425.8±9.6	Lower and Upper intercept age	32.1522	-110.449	U-Pb				zircon			Drewes, H., 1974, Geologic map and sections of the Happy Valley Quadrangle, Cochise County, Arizona: U.S. Geological Survey Miscellaneous Investigations Series Map I-832, scale 1:48,000.
Black Hills near San Manuel	tuff near Signal Peak	2-8-21-1		25.1±0.4		Tuff Zirc 206/238 Age	32.72	-110.751								Orr, T.R., Shipman, T.C., and Spencer, J.E., 2004, Geologic map of the North of Oracle 7 ½' Quadrangle, southeastern Pinal County, Arizona: Arizona Geological Survey Digital Geologic Map 23, v. 2.0, scale 1:24,000.	Date is 25.1 +0.3/-0.4 95% confidence
